# Supplementary material for: Defining the prototypical DNA replication fork trap in bacteria
Source: bioRxiv or medRxiv preprint supplement (doi:10.1101/2021.07.20.453168), 2021-07-22
Supplement: Supplementary file [file media-2.pdf]

BLASTN 2.10.1+: Matrix: blastn matrix 1 -3,  
Gap Penalties: Existence: 5, Extension: 2

Database: final\_high\_quality\_krx\_assembly.fasta  
1 sequences; 4,491,350 total letters

**Query= TerAF**

Length=24

>contig\_2\_pilon  
Length=4491350

Score = 48.1 bits (24), Expect = 2e-07  
Identities = 24/24 (100%), Gaps = 0/24 (0%)  
Strand=Plus/Plus

```
Query 1          CAACCATTAAACCGATTTCGCGGTC 24
                |||
Sbjct 1619469    CAACCATTAAACCGATTTCGCGGTC 1619492
```

**Query= TerAR**

Length=20

>contig\_2\_pilon  
Length=4491350

Score = 40.1 bits (20), Expect = 3e-05  
Identities = 20/20 (100%), Gaps = 0/20 (0%)  
Strand=Plus/Minus

```
Query 1          AGTTGCGATTTCTCCCTGG 20
                |||
Sbjct 1619613    AGTTGCGATTTCTCCCTGG 1619594
```

**Query= TerBF**

Length=22

>contig\_2\_pilon  
Length=4491350

Score = 44.1 bits (22), Expect = 2e-06  
Identities = 22/22 (100%), Gaps = 0/22 (0%)  
Strand=Plus/Plus

```
Query 1          TTACCTCTGCCTGACACTACGC 22
                |||
Sbjct 1962934    TTACCTCTGCCTGACACTACGC 1962955
```

**Query= TerBR**

Length=23

>contig\_2\_pilon  
Length=4491350

Score = 46.1 bits (23), Expect = 6e-07  
Identities = 23/23 (100%), Gaps = 0/23 (0%)  
Strand=Plus/Minus

```
Query 1          TGTGAGTCGGTCTACGAGATCG 23
                |||
Sbjct 1963056    TGTGAGTCGGTCTACGAGATCG 1963034
```

**Query= TerCF**

>contig\_2\_pilon  
Length=4491350

Score = 46.1 bits (23), Expect = 6e-07  
Identities = 23/23 (100%), Gaps = 0/23 (0%)  
Strand=Plus/Plus

Query 1 CTGCATGTGGCACCTGTTAATGA 23  
|||||  
Sbjct 1887884 CTGCATGTGGCACCTGTTAATGA 1887906

**Query= TerCR**

Length=20

>contig\_2\_pilon  
Length=4491350

Score = 40.1 bits (20), Expect = 3e-05  
Identities = 20/20 (100%), Gaps = 0/20 (0%)  
Strand=Plus/Minus

Query 1 GCTGTACGTCCGTTGTGCTA 20  
|||||  
Sbjct 1888006 GCTGTACGTCCGTTGTGCTA 1887987

**Query= TerDF**

Length=25

>contig\_2\_pilon  
Length=4491350

Score = 50.1 bits (25), Expect = 5e-08  
Identities = 25/25 (100%), Gaps = 0/25 (0%)  
Strand=Plus/Plus

Query 1 GGCATGATGTCGCGCtttttttATG 25  
|||||  
Sbjct 1558486 GGCATGATGTCGCGCTTTTTTTATG 1558510

**Query= TerDR**

Length=25

>contig\_2\_pilon  
Length=4491350

Score = 50.1 bits (25), Expect = 5e-08  
Identities = 25/25 (100%), Gaps = 0/25 (0%)  
Strand=Plus/Minus

Query 1 GGGTATTAAGGAGTATTCCCCATGG 25  
|||||  
Sbjct 1558610 GGGTATTAAGGAGTATTCCCCATGG 1558586

**Query= TerEF**

Length=20

>contig\_2\_pilon

Length=4491350

Score = 40.1 bits (20), Expect = 3e-05  
Identities = 20/20 (100%), Gaps = 0/20 (0%)  
Strand=Plus/Plus

```
Query 1      GAAGTCGCCGTCTGGTTTAT 20
          |||
Sbjct 1377410 GAAGTCGCCGTCTGGTTTAT 1377429
```

**Query= TerER**

Length=20

>contig\_2\_pilon  
Length=4491350

Score = 40.1 bits (20), Expect = 3e-05  
Identities = 20/20 (100%), Gaps = 0/20 (0%)  
Strand=Plus/Minus

```
Query 1      TACGGCGGAAGTTAATGGTC 20
          |||
Sbjct 1377581 TACGGCGGAAGTTAATGGTC 1377562
```

**Query= TerFF**

Length=21

>contig\_2\_pilon  
Length=4491350

Score = 42.1 bits (21), Expect = 8e-06  
Identities = 21/21 (100%), Gaps = 0/21 (0%)  
Strand=Plus/Plus

```
Query 1      CACATCTTCGGGAGTCGGTTC 21
          |||
Sbjct 2596624 CACATCTTCGGGAGTCGGTTC 2596644
```

**Query= TerFR**

Length=22

>contig\_2\_pilon  
Length=4491350

Score = 44.1 bits (22), Expect = 2e-06  
Identities = 22/22 (100%), Gaps = 0/22 (0%)  
Strand=Plus/Minus

```
Query 1      GGTGAGTGGTAAACGCTGCTG 22
          |||
Sbjct 2596754 GGTGAGTGGTAAACGCTGCTG 2596733
```

**Query= TerGF**

Length=20

>contig\_2\_pilon  
Length=4491350

Score = 40.1 bits (20), Expect = 3e-05  
Identities = 20/20 (100%), Gaps = 0/20 (0%)

Strand=Plus/Plus

```
Query 1      CCAAGCGAGTACCCCACCAG  20
            |||
Sbjct 2656294 CCAAGCGAGTACCCCACCAG 2656313
```

**Query= TerGR**

Length=23

>contig\_2\_pilon  
Length=4491350

Score = 46.1 bits (23), Expect = 6e-07  
Identities = 23/23 (100%), Gaps = 0/23 (0%)  
Strand=Plus/Minus

```
Query 1      CACGGTTGTATGTTGATCTCCCA  23
            |||
Sbjct 2656435 CACGGTTGTATGTTGATCTCCCA 2656413
```

**Query= TerHF**

Length=24

>contig\_2\_pilon  
Length=4491350

Score = 48.1 bits (24), Expect = 2e-07  
Identities = 24/24 (100%), Gaps = 0/24 (0%)  
Strand=Plus/Plus

```
Query 1      TGAAGGACAAACTGGAAACGCTGA  24
            |||
Sbjct 895054  TGAAGGACAAACTGGAAACGCTGA 895077
```

**Query= TerHR**

Length=20

>contig\_2\_pilon  
Length=4491350

Score = 40.1 bits (20), Expect = 3e-05  
Identities = 20/20 (100%), Gaps = 0/20 (0%)  
Strand=Plus/Minus

```
Query 1      CAGACTACCGCCACCACAAT  20
            |||
Sbjct 895201  CAGACTACCGCCACCACAAT 895182
```

**Query= TerIF**

Length=22

>contig\_2\_pilon  
Length=4491350

Score = 44.1 bits (22), Expect = 2e-06  
Identities = 22/22 (100%), Gaps = 0/22 (0%)  
Strand=Plus/Plus

```
Query 1      ATTGCTGGAACGGTTGATTGCG  22
            |||
Sbjct 920804  ATTGCTGGAACGGTTGATTGCG 920825
```

**Query= TerIR**

Length=20  
>contig\_2\_pilon  
Length=4491350  
  
Score = 40.1 bits (20), Expect = 3e-05  
Identities = 20/20 (100%), Gaps = 0/20 (0%)  
Strand=Plus/Minus

Query 1 CTCGCCGTCTTTACGTAGCA 20  
|||||  
Sbjct 920921 CTCGCCGTCTTTACGTAGCA 920902

**Query= TerJF**

Length=20  
>contig\_2\_pilon  
Length=4491350  
  
Score = 40.1 bits (20), Expect = 3e-05  
Identities = 20/20 (100%), Gaps = 0/20 (0%)  
Strand=Plus/Plus

Query 1 GACGATACGACGCACCGATG 20  
|||||  
Sbjct 2849492 GACGATACGACGCACCGATG 2849511

**Query= TerJR**

Length=22  
>contig\_2\_pilon  
Length=4491350  
  
Score = 44.1 bits (22), Expect = 2e-06  
Identities = 22/22 (100%), Gaps = 0/22 (0%)  
Strand=Plus/Minus

Query 1 CTGGTGATGCCGAACATGGAAG 22  
|||||  
Sbjct 2849641 CTGGTGATGCCGAACATGGAAG 2849620

**Query= OriCF**

Length=22  
>contig\_2\_pilon  
Length=4491350  
  
Score = 44.1 bits (22), Expect = 2e-06  
Identities = 22/22 (100%), Gaps = 0/22 (0%)  
Strand=Plus/Plus

Query 1 CGCACTGCCCTGTGGATAACAA 22  
|||||  
Sbjct 4205199 CGCACTGCCCTGTGGATAACAA 4205220

**Query= OriCR**

Length=22  
>contig\_2\_pilon  
Length=4491350  
  
Score = 44.1 bits (22), Expect = 2e-06  
Identities = 22/22 (100%), Gaps = 0/22 (0%)  
Strand=Plus/Minus

Query 1 CCCTCATTCTGATCCCAGCTTA 22  
|||||  
Sbjct 4205313 CCCTCATTCTGATCCCAGCTTA 4205292
